# Supplementary material for: Configurable multi-state non-volatile memory behaviors in Ti3C2nanosheets
Source: Royal Society of Chemistry journal article supplement (doi:10.1039/c9nr00747d), 2019-01-01
Supplement: c9nr00747d1.pdf [file c9nr00747d1.pdf]

## Supporting Information

### **Configurable Multi-State Non-volatile Memory Behaviors in Ti<sub>3</sub>C<sub>2</sub> Nanosheets**

Guanglong Ding,<sup>ab</sup> Kelin Zeng,<sup>c</sup> Kui Zhou,<sup>a</sup> Zongxiao Li,<sup>c</sup> Ye Zhou,<sup>\*c</sup> Yongbiao Zhai,<sup>a</sup> Li Zhou,<sup>a</sup> Xiaoli Chen,<sup>a</sup> Su-Ting Han<sup>\*a</sup>

<sup>a</sup> College of Electronic Science and Technology, Shenzhen University, Shenzhen 518060, P. R. China. E-mail: sutinghan@szu.edu.cn

<sup>b</sup> Key Laboratory of Optoelectronic Devices and Systems of Ministry of Education and Guangdong Province, College of Optoelectronic Engineering, Shenzhen University, Shenzhen 518060, P. R. China

<sup>c</sup> Institute for Advanced Study, Shenzhen University, Shenzhen 518060, P. R. China. E-mail: yezhou@szu.edu.cn

## **Experimental section**

### **1. Synthesis of $\text{Ti}_3\text{C}_2$ Nanosheets**

To synthesize the  $\text{Ti}_3\text{C}_2$  nanosheets, 2g  $\text{Ti}_3\text{AlC}_2$  power was immersed in 30 mL 50% HF (Aladdin Reagent Co. Ltd., Shanghai, China), and stirring at 200 rpm for 24 h at room temperature (25 °C). The resulting suspensions were washed by deionized water until the  $\text{pH} \approx 5$ , then centrifuged at 3500 rpm to separate remaining HF. The obtained wet sediment was suspended in 30 mL DMSO stirring for 18 h at room temperature, then centrifuged at 3500 rpm for 10 min to remove DMSO. Subsequently, deionized water (weight ratio of MXene to water, 1:300) were added to the residue, ultra-sonicated for 4 hours with the protection of  $\text{N}_2$ , centrifuged at 3500 rpm for 2 h. At last, the supernatant was collected for further experiments. The concentration of synthetic  $\text{Ti}_3\text{C}_2$  solution was measured by filtering specific amounts of colloidal solution through a polypropylene filter (Tianjin Jinteng Experiment Equipment Co., Ltd, Tianjin, China), followed by overnight drying under a vacuum at 70 °C. The MXene yield-defined here as the weight of  $\text{Ti}_3\text{C}_2$  after DMSO treatment divided by the weight of powders before HF treatment  $\times 100$ -is about 21.3%.

### **2. Characterization of $\text{Ti}_3\text{C}_2$ Nanosheets and memory device**

X-ray powder diffraction (XRD) pattern spectra for  $\text{Ti}_3\text{C}_2$  were recorded on a X Bruker D8. Raman spectra were measured by a Raman spectrometer equipped with a 473 nm laser source excitation (Lab RAM ARAMIS, Horiba Scientific). Scanning electron microscopy (SEM) was taken on field-emission scanning electron microscopy (FE-SEM, Carl Zeiss, MERLIN Compact). The transmission electron

microscope (TEM) image was obtained by Tecnai F30 (FEI company) operating at 200 kV under bright-field mode. The topographic characterization was done using AFM (Bruker, Dimension Icon) under tapping mode, and the Scanasyst air tip was always kept under a clean and dry ambient atmosphere. Ultraviolet Photoelectron Spectroscopy (UPS) data was obtained using EscaLab 250Xi (ThermoFisher). The electrical properties of the  $\text{Ti}_3\text{C}_2$ -based memory device were characterized by 4200-SCS parameter analyzer (Keithley, USA) under DC sweep mode. C-AFM and KPFM were respectively carried out using SCM-PIC and SCM-PIT type tips from Bruker. The scanning rate for C-AFM in the contact mode were 0.5 Hz.

### **3. Preparation of the $\text{Ti}_3\text{C}_2$ -based memory device**

To fabricate  $\text{Ti}_3\text{C}_2$  based rigid memory devices, the glass (2 cm  $\times$  2 cm) substrate coated with 185 nm thick indium tin oxide (ITO) was cleaned sequentially by Decon 90 and ultrapure water and ITO was used as BE. The  $\text{Ti}_3\text{C}_2$ -PVPy mixture was obtained by dispersing a certain amount of  $\text{Ti}_3\text{C}_2$  using 20 mg mL<sup>-1</sup> PVPy DMF solution. By spin-coating at 3000 rpm for 40 seconds in the atmosphere, the  $\text{Ti}_3\text{C}_2$ -PVPy mixture was deposited onto the ITO/glass substrate and used as the active layer. After annealing at 120 °C for 120 min in a vacuum oven, the TE was fabricated by depositing 30 nm thick Al in thermal evaporator through a laser-patterned shadow mask with 4 different size electrode area (diameter: 100, 250, 500, 1000  $\mu\text{m}$ ). The subminiature device was fabricated using micrograte supporting film (Zhongjingkeyi (Beijing) Films Technology Co., Ltd) as shadow mask. The diameter of probe tip for subminiature device is about 0.2  $\mu\text{m}$  (PL-T02, Zhanxin (Shenzhen) Technology Co., Ltd). The

deposition rate of Al was  $2 \text{ \AA s}^{-1}$  in the thermal evaporator. To fabricate flexible  $\text{Ti}_3\text{C}_2$  based memory devices, a 185 nm thick ITO-coated poly(ethylene naphthalate) (PEN) substrate (175  $\mu\text{m}$  thick,  $2 \text{ cm} \times 2 \text{ cm}$ ,  $6 \Omega \square^{-1}$ ), was first cleaned by  $\text{O}_2$  plasma for 5 min and then used as substrate. All the other aspects of the procedure remained identical. The electrical properties of the  $\text{Ti}_3\text{C}_2$ -based memory devices were characterized by Keithley 4200-SCS semiconductor parameter analyzers equipped with a PRCBE probe station with a temperature controller. Moreover, except for the cell area dependence characters, the other electrical properties, including  $I$ - $V$  curves, retention and cycle, were measured using the device with a diameter about 250  $\mu\text{m}$ . All the set-up was fixed on antivibration mounting. During characterization, the upper Al electrodes were applied with voltage bias, and the ITO electrodes were grounded. More than 100 devices were characterized in the electrical investigation.

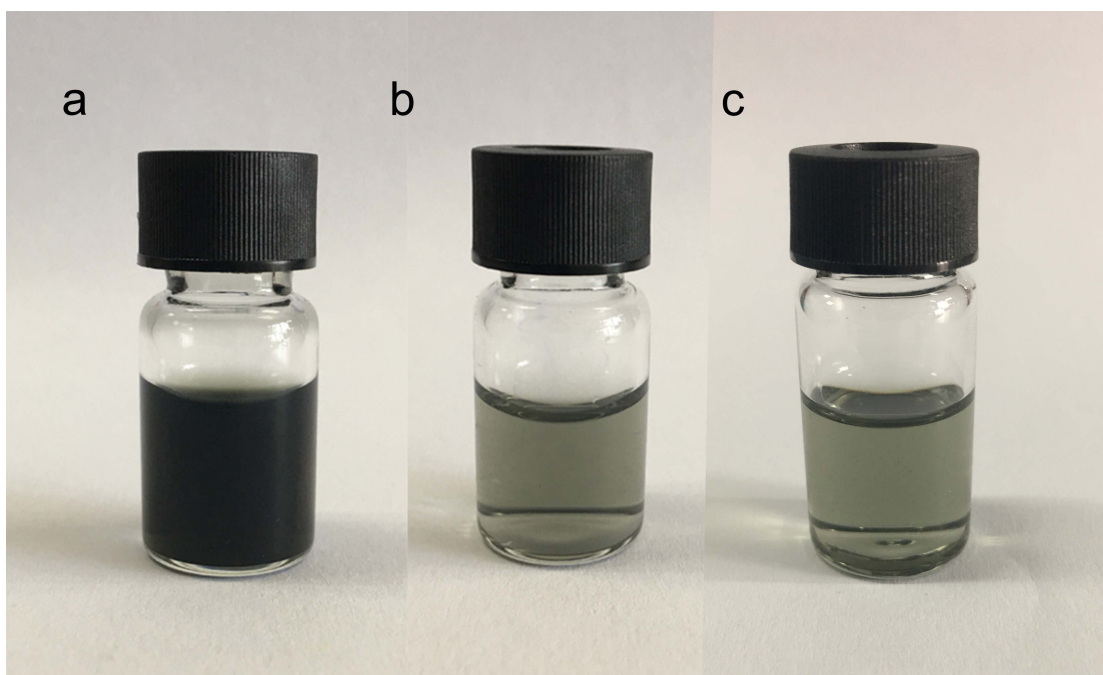

**Figure S1.** (a) Photograph of the MXene ( $\text{Ti}_3\text{C}_2$ ) colloid solution (A,  $2.5 \text{ mg mL}^{-1}$ ). (b) The mixture of  $\text{Ti}_3\text{C}_2$  ( $0.24 \text{ mg mL}^{-1}$ ) and PVPy ( $20 \text{ mg mL}^{-1}$ ). (c) The mixture of  $\text{Ti}_3\text{C}_2$  ( $0.24 \text{ mg mL}^{-1}$ ) and PVPy ( $20 \text{ mg mL}^{-1}$ ) after 30 days, indicating the excellent uniformity.

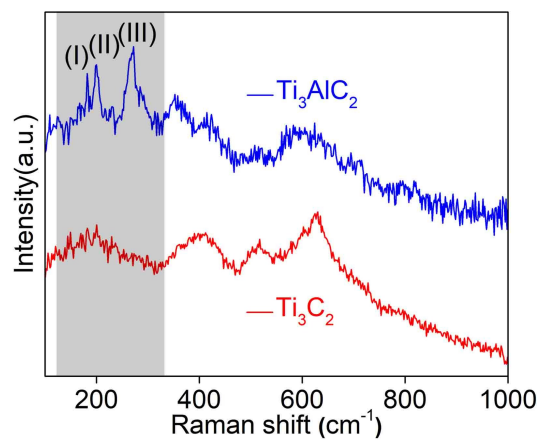

**Figure S2.** Raman spectra of the Ti<sub>3</sub>AlC<sub>2</sub> MAX (powder) and Ti<sub>3</sub>C<sub>2</sub> MXene film.

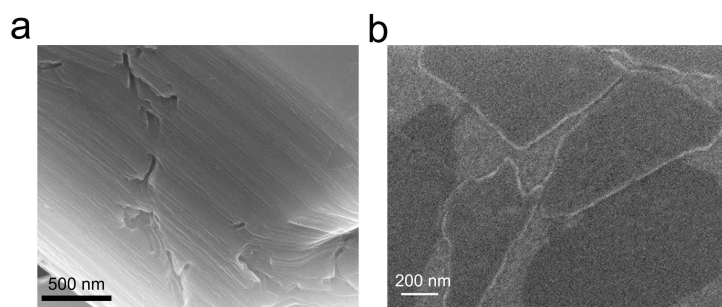

**Figure S3.** The SEM images of the MAX ( $\text{Ti}_3\text{AlC}_2$ ) after HF treatment (a) and dispersive MXene (b).

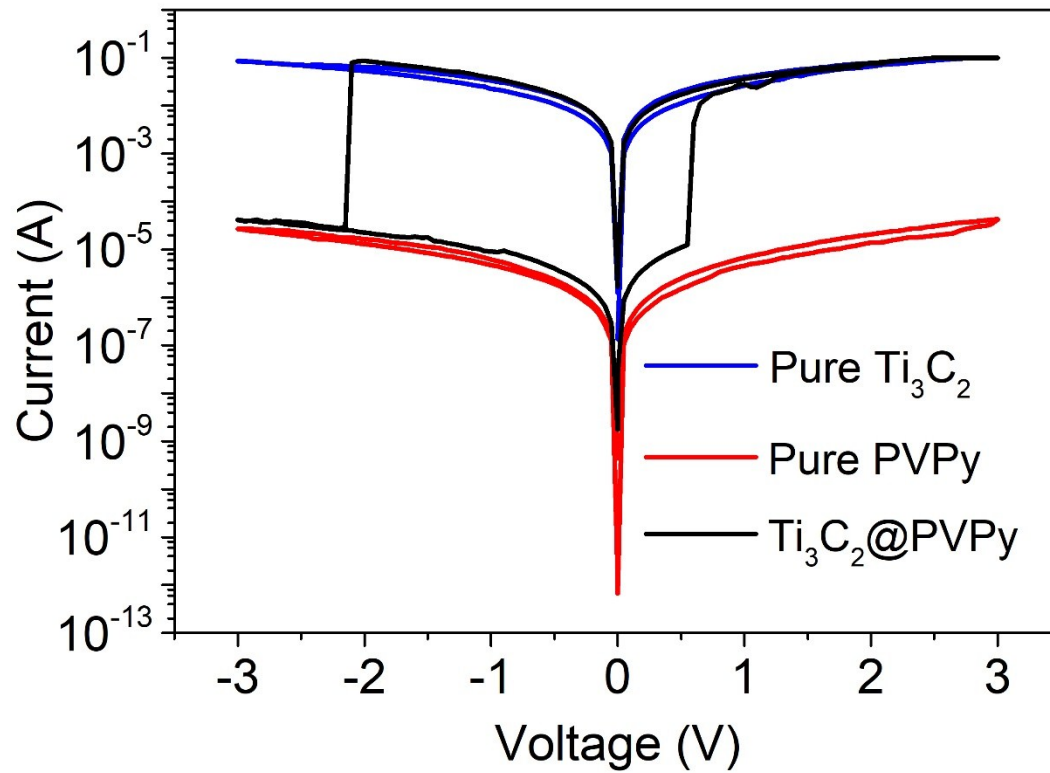

**Figure S4.** The  $I$ - $V$  curves of pure  $\text{Ti}_3\text{C}_2$ , pure PVPy and  $\text{Ti}_3\text{C}_2$ @PVPy mixtures (PVPy: 20 mg mL<sup>-1</sup>,  $\text{Ti}_3\text{C}_2$ : 0.24 mg mL<sup>-1</sup>) based RRAM devices.

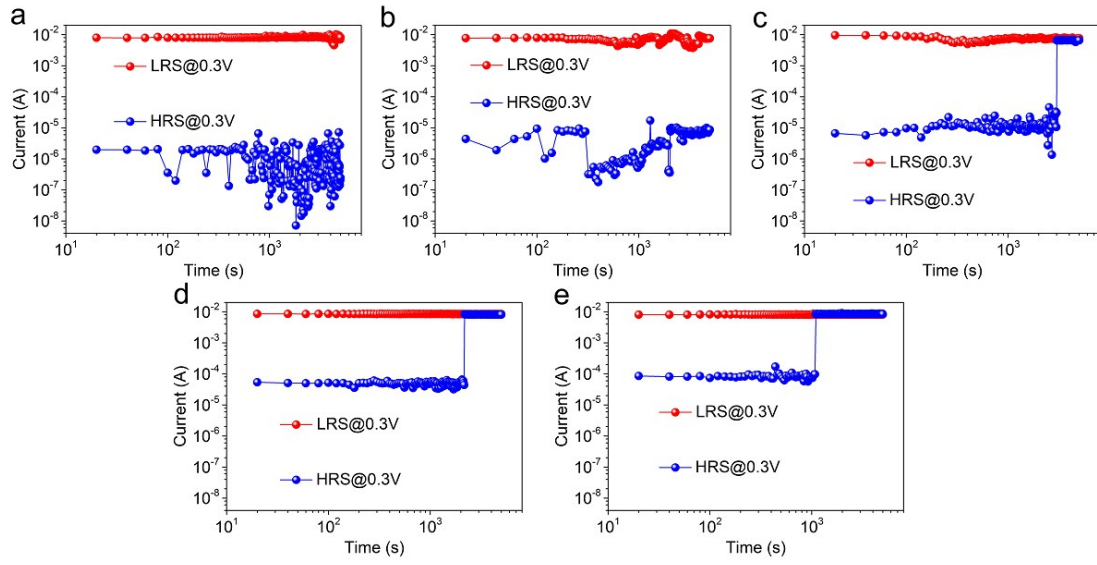

**Figure S5.** The retention characters of  $\text{Ti}_3\text{C}_2$  based RRAM under different temperatures (a: 30°C, b: 50°C, c: 70°C, d: 90°C, e: 110°C).

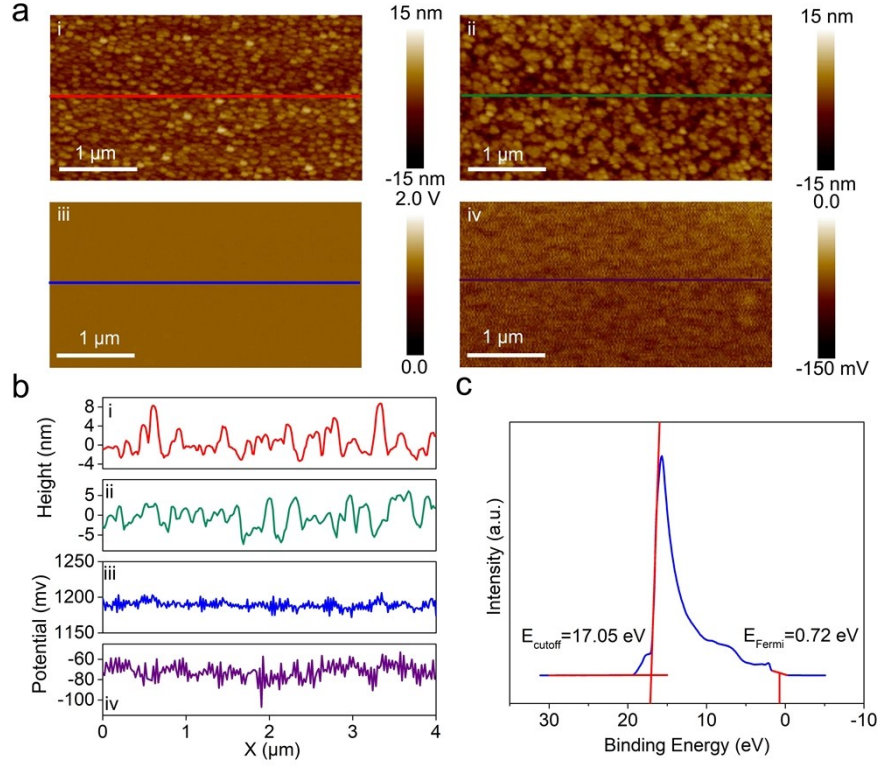

**Figure S6.** (a) and (b) The AFM morphology and KPFM surface potential distribution of Al (left) and ITO electrode (right). The work function of KPFM tip is about 5.0 eV. Therefore, the work function of Al and ITO could be calculated to be 3.9 eV and 5.1eV according to  $V_{CPD} = V_{Sample} - V_{Tip}$ . c) The UPS image of MXene ( $Ti_3C_2$ ) nanosheet. (According to the Figure 3c ( $E_{cutoff} = 17.08$  eV,  $E_{Fermi} = 0.77$  eV) and the formula  $\phi_{MXene} = \hbar\nu - (E_{Cutoff} - E_F)$ ,  $\phi_{MXene} = 21.2$  eV - (17.08 eV - 0.77 eV) = 4.91 eV).

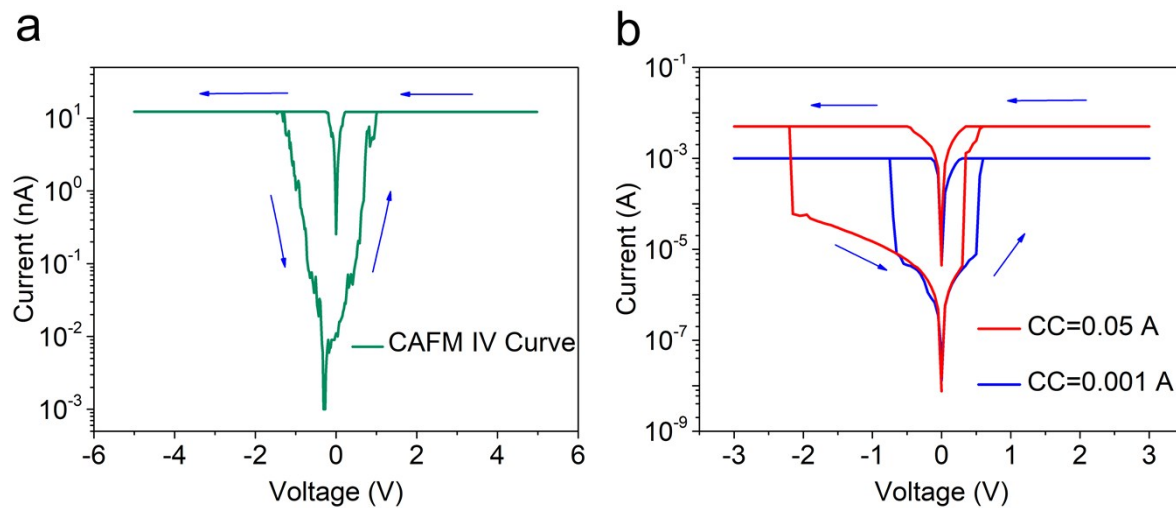

**Figure S7.** The  $I$ - $V$  curves collected by C-AFM using Ramp program (a) and probe station (b).

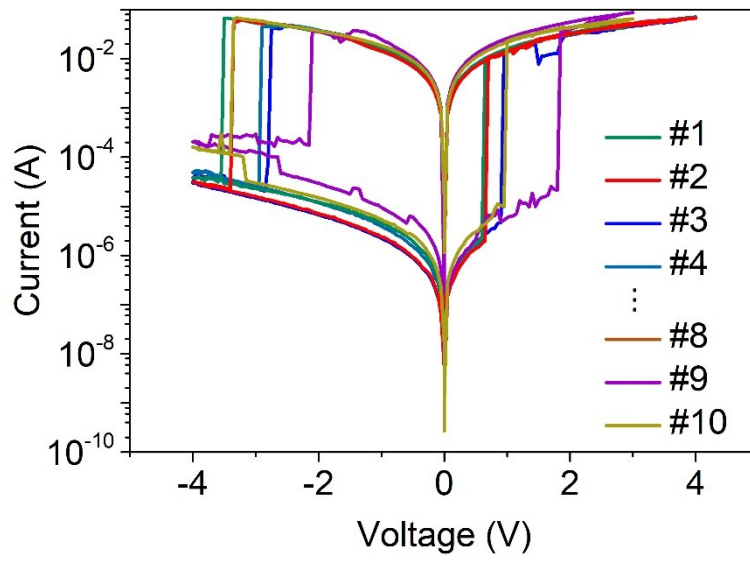

**Figure S8.** The  $I$ - $V$  curves of the small size cross-point  $\text{Ti}_3\text{C}_2$  based devices ( $100\ \mu\text{m}$ ).

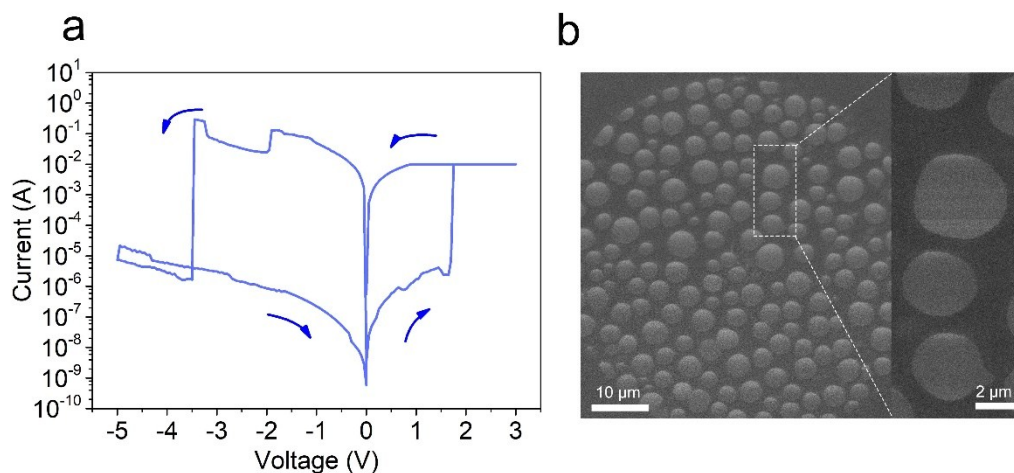

**Figure S9.** a) The  $I$ - $V$  curve of small size device (diameter: 3-5 $\mu\text{m}$ ) collected using probe station. b) The pictures of small size device collected by SEM; The subminiature device was fabricated using micrograte supporting film (Zhongjingkeyi(Beijing) Films Technology Co., Ltd) as shadow mask; The diameter of probe tip for subminiature device is about 0.2  $\mu\text{m}$  (PL-T02, Zhanxin (Shenzhen) Technology Co., Ltd).

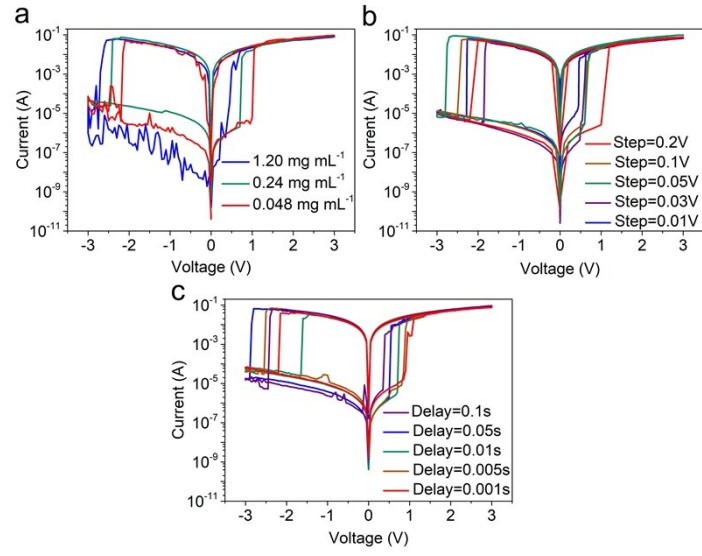

**Figure S10.** a) The  $I$ - $V$  curves of memories with different  $\text{Ti}_3\text{C}_2$  concentrations. b) The  $I$ - $V$  curves of RRAM with different voltage step. c) The  $I$ - $V$  curves of memories with different delay times.

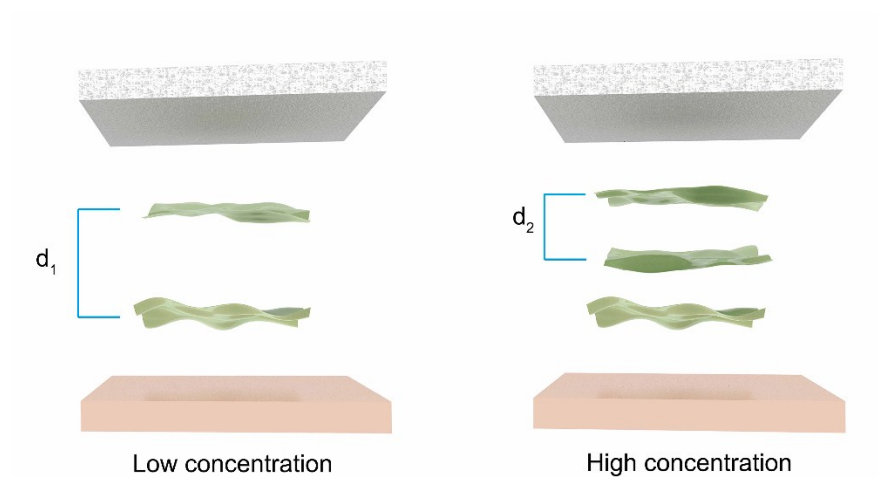

**Figure S11** The schematic diagram of the distance of traps on adjacent nanosheets ( $d_2 < d_1$ ).

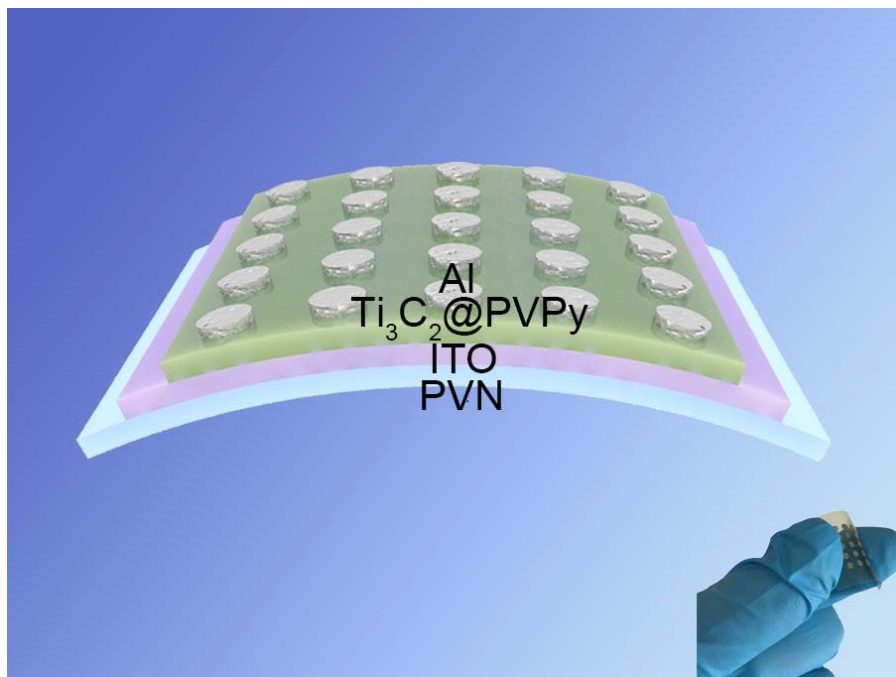

**Figure S12.** Schematic of the PEN/ITO/ $\text{Ti}_3\text{C}_2@\text{PVPy}$ /Al (inset: the optical image of  $\text{Ti}_3\text{C}_2$  memory devices fabricated on flexible substrate).

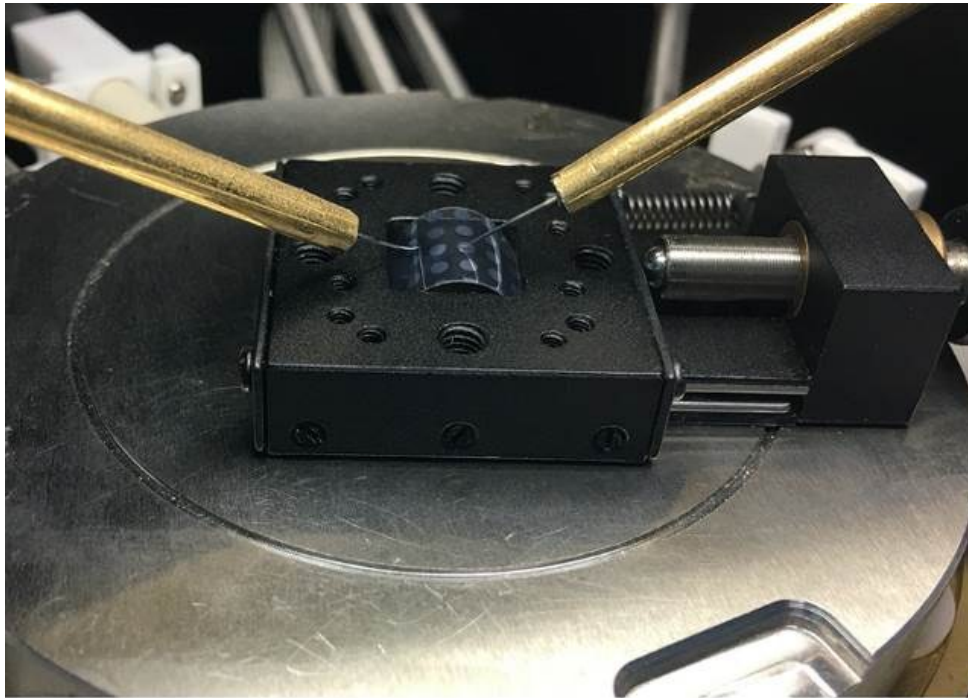

**Figure S13.** Illustration of test condition during the bending test (the measured devices were near the middle of the sample).

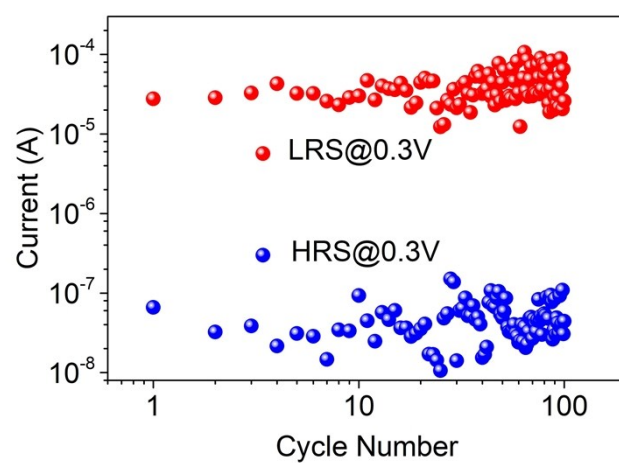

**Figure S14.** The reliability of the  $\text{Ti}_3\text{C}_2$ -based flexible memories.

**Table S1.** The summary of the electrical performances of RRAMs based on 2D materials in recent years

| Device structure                                                  | Memory effect | $V_{\text{SET}}$ (V) | ON/OFF ratio       | Journal name                           |
|-------------------------------------------------------------------|---------------|----------------------|--------------------|----------------------------------------|
| Ag/MoS <sub>2</sub> @PVA/Ag                                       | Rewritable    | 3                    | $1.28 \times 10^2$ | Sci. Rep. <sup>[1]</sup>               |
| Al/2H-MoS <sub>2</sub> @PVP/ITO                                   | Rewritable    | 0.7                  | 10                 | Small <sup>[2]</sup>                   |
| Al/1T@2H-MoS <sub>2</sub> @PVP/ITO                                | WORM          | 1.24                 | $2 \times 10^2$    | Small <sup>[2]</sup>                   |
| Ag/WS <sub>2</sub> /Ag                                            | Rewritable    | 2                    | $10^3$             | Semicond. Sci. Tech. <sup>[3]</sup>    |
| Ggraphene/hBN/Ggraphene                                           | Rewritable    | 2.7                  | $10^3$             | 2D Mater. <sup>[4]</sup>               |
| Ag/hBN/Au                                                         | Rewritable    | -1.3                 | $1 \times 10^2$    | 2D Mater. <sup>[5]</sup>               |
| Au/BaTiO <sub>3</sub> /MoSe <sub>2</sub> /SiO <sub>2</sub> /Si/Al | Rewritable    | 0.6                  | $1 \times 10^2$    | J. Mater. Chem. C <sup>[6]</sup>       |
| Ag/hBN/Cu foil                                                    | Rewritable    | 0.72                 | $1 \times 10^2$    | Adv. Funct. Mater. <sup>[7]</sup>      |
| ITO/hBN/graphene                                                  | Rewritable    | 0.66                 | $4.8 \times 10^2$  | ACS Nano <sup>[8]</sup>                |
| Al/MoS <sub>2</sub> @PCBM/ITO                                     | WORM          | 2                    | $3 \times 10^2$    | ACS Appl. Mater. Inter. <sup>[9]</sup> |
| Al/Ti <sub>3</sub> C <sub>2</sub> @PVPy/ITO                       | Rewritable    | 0.5                  | $10^4$             | This work                              |

## References

- [1] M. M. Rehman, G. U. Siddiqui, J. Z. Gul, S. W. Kim, J. H. Lim, K. H. Choi, *Sci. Rep.* **2016**, *6*, 36195.
- [2] P. Zhang, C. Gao, B. Xu, L. Qi, C. Jiang, M. Gao, D. Xue, *Small* **2016**, *12*, 2077.
- [3] M. M. Rehman, G. U. Siddiqui, Y. H. Doh, K. H. Choi, *Semicond. Sci. Tech.* **2017**, *32*, 095001.
- [4] C. Pan, E. Miranda, M. A. Villena, N. Xiao, X. Jing, X. Xie, T. Wu, F. Hui, Y. Shi, M. Lanza, *2D Mater.* **2017**, *4*, 025099.
- [5] F. Hui, M. A. Villena, W. Fang, A.-Y. Lu, J. Kong, Y. Shi, X. Jing, K. Zhu, M. Lanza, *2D Mater.* **2018**, *5*, 031011.
- [6] J. P. B. Silva, C. Almeida Marques, J. A. Moreira, O. Conde, *J. Mater. Chem. C* **2017**, *5*, 10353.
- [7] K. Qian, R. Y. Tay, V. C. Nguyen, J. Wang, G. Cai, T. Chen, E. H. T. Teo, P. S. Lee, *Adv. Funct. Mater.* **2016**, *26*, 2176.
- [8] K. Qian, R. Y. Tay, M.-F. Lin, J. Chen, H. Li, J. Lin, J. Wang, G. Cai, V. C. Nguyen, E. H. T. Teo, T. Chen, P. S. Lee, *ACS Nano* **2017**, *11*, 1712.
- [9] W. Lv, H. Wang, L. Jia, X. Tang, C. Lin, L. Yuwen, L. Wang, W. Huang, R. Chen, *ACS Appl. Mater. Inter.* **2018**, *10*, 6552.
